# Supplementary material
Source: PubMed Central journal article supplement (PMC7610542)
Supplement: EMS115903-supplement-Suppl_Table_1.pdf [file EMS115903-supplement-Suppl_Table_1.pdf]

|                               | TnfR1 <sup>F/F</sup> mice (n=8) |           |    |         | TnfR1 <sup>CNEO/-</sup> mice (n=9) |           |   |         | TnfR1 <sup>Ccl19-KO</sup> mice (n=8) |           |   |         | TnfR1 <sup>Col6a1-KO</sup> mice (n=8) |           |   |         |
|-------------------------------|---------------------------------|-----------|----|---------|------------------------------------|-----------|---|---------|--------------------------------------|-----------|---|---------|---------------------------------------|-----------|---|---------|
|                               | Rel. abund(%) <sup>#</sup>      | IgA index | n* | P value | Rel. abund (%)                     | IgA index | n | P value | Rel. abund (%)                       | IgA index | n | P value | Rel. abund (%)                        | IgA index | n | P value |
| <b>Bacteroidaceae</b>         | 2.5±0.529                       | -2,43     | 8  | 0,0078  | 1.4±0.111                          | -1,99     | 9 | 0,0039  | 1±0.318                              | -2,25     | 8 | 0,0391  | 1.4±0.17                              | -1,88     | 8 | n.s.    |
| <i>Bacteroides</i>            | 2.5±0.529                       | -2,43     | 8  | 0,0078  | 1.4±0.111                          | -1,99     | 9 | 0,0039  | 1±0.318                              | -2,25     | 8 | 0,0391  | 1.4±0.17                              | -1,88     | 8 | n.s.    |
| <b>Marinifilaceae</b>         | 1.7±0.254                       | -2,30     | 8  | 0,0078  | 1.9±0.258                          | -3,03     | 9 | 0,0039  | 1±0.122                              | -4,73     | 8 | 0,0078  | 1.5±0.128                             | -3,37     | 8 | 0,0078  |
| <i>Odoribacter</i>            | 1.7±0.254                       | -2,30     | 8  | 0,0078  | 2.1±0.258                          | -3,03     | 9 | 0,0039  | 1±0.122                              | -4,73     | 8 | 0,0078  | 1.5±0.128                             | -3,37     | 8 | 0,0078  |
| <b>Muribaculaceae</b>         | 44.2±1.984                      | 0,57      | 8  | 0,0078  | 49.1±2.897                         | 0,39      | 9 | 0,0039  | 51.3±3.168                           | 0,21      | 8 | 0,0156  | 40.4±4.695                            | 0,39      | 8 | 0,0156  |
| <i>Muribaculum</i>            | 0.3±0.034                       | -4,68     | 8  | 0,0078  | 0.3±0.029                          | -4,42     | 9 | 0,0039  | 0.4±0.061                            | -4,56     | 8 | 0,0156  | 0.3±0.048                             | -4,16     | 8 | 0,0234  |
| <i>Other Muribaculaceae</i>   | 43.8±1.974                      | 0,57      | 8  | 0,0078  | 47.7±2.902                         | 0,40      | 9 | 0,0039  | 50.9±3.136                           | 0,21      | 8 | 0,0156  | 40.2±4.677                            | 0,40      | 8 | 0,0156  |
| <b>Prevotellaceae</b>         | 4.6±1.182                       | -1,16     | 8  | n.s.    | 7.2±1.357                          | -2,36     | 9 | 0,0039  | 5.1±0.996                            | -3,37     | 8 | 0,0078  | 5.9±1.281                             | -1,31     | 8 | 0,0234  |
| <i>Alloprevotella</i>         | 1.2±0.322                       | -3,18     | 8  | 0,0078  | 2.3±0.613                          | -2,14     | 9 | 0,0039  | 1.9±0.554                            | -3,96     | 8 | 0,0078  | 1.8±0.311                             | -1,23     | 8 | n.s.    |
| <i>Prevotellaceae UCG</i>     | 3.4±0.977                       | -2,48     | 8  | 0,0391  | 5.1±0.807                          | -2,94     | 9 | 0,0039  | 3.1±0.565                            | -5,11     | 8 | 0,0078  | 4.1±1.128                             | -2,26     | 6 | 0,0156  |
| <b>Rikenellaceae</b>          | 2.6±0.31                        | -1,90     | 8  | 0,0078  | 2.1±0.184                          | -2,12     | 9 | 0,0039  | 1.6±0.23                             | -2,56     | 8 | 0,0078  | 2.5±0.342                             | -2,57     | 8 | 0,0078  |
| <i>Alistipes</i>              | 2.3±0.33                        | -1,97     | 8  | 0,0078  | 1.8±0.173                          | -2,04     | 9 | 0,0039  | 1.3±0.202                            | -2,55     | 8 | 0,0078  | 2±0.34                                | -3,10     | 8 | 0,0078  |
| <i>Rikenella</i>              | 0.2±0.022                       | -4,19     | 8  | 0,0078  | 0.2±0.028                          | -4,49     | 9 | 0,0039  | 0.2±0.038                            | -3,20     | 8 | 0,0234  | 0.3±0.033                             | -5,00     | 8 | 0,0078  |
| <i>RC9 gut group</i>          | 0.1±0.029                       | -1,90     | 6  | 0,0156  | 0.1±0.023                          | -3,23     | 9 | 0,0039  | 0.1±0.02                             | -3,89     | 4 | 0,0313  | 0.2±0.019                             | -2,15     | 8 | 0,0156  |
| <b>Staphylococcaceae</b>      | 0.2±0.118                       | 2,71      | 8  | 0,0156  | 0.2±0.071                          | -1,15     | 9 | n.s.    | 0.2±0.056                            | -0,81     | 8 | n.s.    | 0.3±0.088                             | 1,58      | 8 | 0,0078  |
| <i>Staphylococcus</i>         | 0.2±0.114                       | 2,71      | 8  | 0,0156  | 0.2±0.068                          | -1,12     | 9 | n.s.    | 0.2±0.053                            | -0,84     | 8 | n.s.    | 0.3±0.082                             | 1,60      | 8 | 0,0078  |
| <b>Lactobacillaceae</b>       | 6.3±0.773                       | -0,36     | 8  | n.s.    | 9.9±0.801                          | -0,20     | 9 | n.s.    | 11.3±0.997                           | 0,19      | 8 | n.s.    | 8.5±1.109                             | 0,22      | 8 | n.s.    |
| <i>Lactobacillus</i>          | 6.3±0.773                       | -0,36     | 8  | n.s.    | 9.6±0.801                          | -0,20     | 9 | n.s.    | 11.3±0.997                           | 0,19      | 8 | 0,3125  | 8.5±1.109                             | 0,22      | 8 | n.s.    |
| <b>Clostridiaceae 1</b>       | 0.3±0.085                       | 0,39      | 8  | n.s.    | 0.3±0.071                          | -0,17     | 9 | n.s.    | 0.4±0.112                            | -0,24     | 8 | n.s.    | 0.4±0.095                             | 1,41      | 8 | 0,0078  |
| <i>Candidatus Arthromitus</i> | 0.3±0.087                       | 0,47      | 8  | n.s.    | 0.2±0.049                          | 0,12      | 9 | n.s.    | 0.4±0.105                            | -0,10     | 8 | n.s.    | 0.4±0.084                             | 1,45      | 8 | 0,0078  |
| <b>Lachnospiraceae</b>        | 22.3±2.36                       | -1,60     | 8  | 0,0078  | 15.1±2.21                          | -0,98     | 9 | 0,0039  | 15.5±1.588                           | -1,05     | 8 | 0,0234  | 23.6±4.793                            | -0,83     | 8 | 0,0391  |
| <i>ASF356</i>                 | 0.5±0.163                       | -5,83     | 8  | 0,0078  | 0.1±0.043                          | -4,87     | 5 | n.s.    | 0.1±0.044                            | -4,79     | 6 | 0,0156  | 0.2±0.044                             | -4,96     | 8 | 0,0078  |
| <i>Blautia</i>                | 0.3±0.103                       | -4,42     | 4  | 0,0313  | 0.2±0.047                          | -3,88     | 7 | 0,0078  | 0.2±0.06                             | -4,78     | 6 | 0,0156  | 0.4±0.16                              | -2,94     | 6 | n.s.    |
| <i>Marvinbryantia</i>         | 0.3±0.067                       | 1,14      | 8  | 0,0391  | 0.2±0.036                          | 1,91      | 9 | 0,0078  | 0.2±0.077                            | 1,44      | 6 | 0,0156  | 0.2±0.085                             | 2,75      | 8 | 0,0391  |
| <i>Lachnoclostridium</i>      | 0.5±0.061                       | -1,99     | 8  | 0,0078  | 0.5±0.061                          | -1,81     | 9 | 0,0039  | 0.6±0.053                            | -1,20     | 8 | 0,0078  | 0.7±0.076                             | -1,76     | 8 | 0,0078  |
| <i>Roseburia</i>              | 0.9±0.154                       | -2,25     | 8  | 0,0156  | 0.6±0.094                          | -4,18     | 9 | 0,0039  | 0.9±0.152                            | -3,41     | 8 | 0,0078  | 0.8±0.226                             | -2,36     | 8 | n.s.    |
| <i>Other Lachnospiraceae</i>  | 19.1±2.012                      | -1,92     | 8  | 0,0078  | 13.5±2.026                         | -1,13     | 9 | 0,0039  | 12.9±1.45                            | -1,15     | 8 | 0,0234  | 20.6±4.415                            | -1,15     | 8 | 0,0234  |
| <b>Ruminococcaceae</b>        | 11.7±1.078                      | -1,19     | 8  | 0,0078  | 8.5±0.735                          | -0,86     | 9 | 0,0039  | 7.4±0.764                            | -1,14     | 8 | 0,0078  | 12±1.781                              | -0,76     | 8 | 0,0156  |
| <i>Anaerotruncus</i>          | 0.5±0.125                       | -5,46     | 8  | 0,0078  | 0.3±0.126                          | -3,36     | 9 | 0,0039  | 0.2±0.043                            | -5,07     | 6 | 0,0156  | 0.4±0.085                             | -5,55     | 8 | 0,0078  |
| <i>Butyricoccus</i>           | 0.3±0.072                       | -1,80     | 8  | n.s.    | 0.2±0.039                          | -0,51     | 9 | n.s.    | 0.1±0.032                            | -0,43     | 8 | n.s.    | 0.3±0.061                             | -0,04     | 8 | n.s.    |
| <i>Intestinimonas</i>         | 0.3±0.045                       | -1,53     | 8  | n.s.    | 0.2±0.039                          | -1,47     | 7 | n.s.    | 0.1±0.019                            | -1,84     | 6 | n.s.    | 0.2±0.053                             | -0,39     | 6 | n.s.    |
| <i>Oscillibacter</i>          | 0.6±0.187                       | -2,92     | 8  | 0,0078  | 0.4±0.078                          | -1,19     | 9 | n.s.    | 0.2±0.056                            | -3,10     | 4 | n.s.    | 0.8±0.178                             | -1,96     | 8 | 0,0156  |
| <i>Ruminiclostridium</i>      | 1.8±0.446                       | -1,94     | 8  | 0,0078  | 0.9±0.148                          | -0,85     | 9 | n.s.    | 0.5±0.103                            | -2,00     | 8 | n.s.    | 2±0.474                               | -1,15     | 8 | n.s.    |
| <i>Ruminiclostridium 5</i>    | 0.7±0.12                        | -1,01     | 8  | 0,0156  | 0.5±0.111                          | -0,46     | 9 | n.s.    | 0.5±0.142                            | -1,10     | 8 | n.s.    | 0.8±0.167                             | -0,64     | 8 | n.s.    |
| <i>Ruminiclostridium 9</i>    | 1.2±0.241                       | -2,82     | 8  | 0,0078  | 1±0.113                            | -1,40     | 9 | 0,0039  | 0.9±0.083                            | -1,66     | 8 | 0,0234  | 1.2±0.276                             | -0,47     | 8 | n.s.    |
| <i>Ruminococcus 1</i>         | 0.4±0.138                       | -2,53     | 8  | 0,0156  | 0.3±0.102                          | -1,29     | 9 | n.s.    | 0.2±0.083                            | -2,51     | 4 | n.s.    | 0.3±0.106                             | -2,88     | 8 | n.s.    |
| <i>Other Ruminococcaceae</i>  | 5.5±0.629                       | -1,08     | 8  | 0,0078  | 4.9±0.342                          | -1,04     | 9 | 0,0039  | 4.5±0.459                            | -1,34     | 8 | 0,0078  | 5.2±0.598                             | -1,02     | 8 | 0,0078  |
| <b>Erysipelotrichaceae</b>    | 0.5±0.114                       | -2,22     | 8  | 0,0078  | 1.1±0.274                          | -0,83     | 9 | 0,0273  | 1.7±0.318                            | -0,82     | 8 | 0,0078  | 0.4±0.089                             | -1,79     | 8 | 0,0156  |
| <i>Turcibacter</i>            | 0.3±0.111                       | -1,05     | 6  | n.s.    | 0.7±0.229                          | -0,91     | 9 | 0,0195  | 1.2±0.318                            | -0,57     | 8 | 0,0156  | 0.1±0.057                             | -1,17     | 2 | n.s.    |
| <b>Desulfovibrionaceae</b>    | 0.9±0.217                       | -4,51     | 8  | 0,0078  | 0.8±0.152                          | -5,66     | 9 | 0,0039  | 0.6±0.13                             | -6,20     | 8 | 0,0078  | 1±0.172                               | -6,31     | 8 | 0,0078  |
| <i>Desulfovibrio</i>          | 0.8±0.215                       | -4,33     | 8  | 0,0078  | 0.7±0.136                          | -5,97     | 9 | 0,0039  | 0.6±0.129                            | -6,18     | 8 | 0,0078  | 0.9±0.156                             | -6,64     | 8 | 0,0078  |
| <b>Enterobacteriaceae</b>     | 0±0.011                         | 5,21      | 8  | 0,0078  | 0±0.023                            | 0,63      | 8 | n.s.    | 0.2±0.048                            | 1,69      | 8 | n.s.    | 0±0                                   | 7,16      | 8 | 0,0078  |
| <i>Escherichia-Shigella</i>   | 0±0.011                         | 4,36      | 8  | 0,0078  | 0±0.012                            | 1,17      | 7 | n.s.    | 0.1±0.021                            | 1,11      | 4 | n.s.    | 0±0                                   | 6,46      | 8 | 0,0078  |
| <b>Pseudomonadaceae</b>       | 0±0.008                         | 4,84      | 8  | 0,0078  | 0.1±0.043                          | 2,72      | 9 | 0,0039  | 0.2±0.043                            | 3,00      | 8 | 0,0078  | 0±0                                   | 6,36      | 8 | 0,0078  |
| <i>Pseudomonas</i>            | 0±0.008                         | 4,84      | 8  | 0,0078  | 0.1±0.043                          | 2,72      | 9 | 0,0039  | 0.2±0.043                            | 3,00      | 8 | 0,0078  | 0±0                                   | 6,36      | 8 | 0,0078  |

<sup>#</sup> Rel. abund.: relative abundance is shown as the mean ± SEM percentage in the unsorted population

\* n, number of mice in the indicated group where this taxon was detected
